# Supplementary material
Source: Research Square preprint supplement (doi:10.21203/rs.3.rs-10185373/v1)
Supplement: Supplementary file 1 [file 5755d21e14b6fcff65bb6a91.docx]

Supplemental 1

Annual preterm birth rates according to newborn sex. Ecuador, 2015–2023.

| **Year** | **PTNB Rate /100 LB** | |  |
| --- | --- | --- | --- |
| **Male** | **Female** | **TR 1** |
| 2015 | 6.76 | 6.34 | 1.07 |
| 2016 | 6.98 | 6.39 | 1.09 |
| 2017 | 4.97 | 9.43 | 0.53 |
| 2018 | 7.57 | 6.90 | 1.10 |
| 2019 | 7.87 | 7.16 | 1.10 |
| 2020 | 7.23 | 6.59 | 1.10 |
| 2021 | 7.62 | 6.96 | 1.09 |
| 2022 | 8.08 | 7.42 | 1.09 |
| 2023 | 7.83 | 7.15 | 1.09 |
| Mean | 7.15 | 7.13 | 1.00 |
| APV (95% CI) | 1.30 (-0.07, 2.70)a | 0.20 (-1.16, 1.58)(a | 1.10 (-1.63, 3.91)a |
| p | 0.11 | 0.78 | 0.44 |

Abbreviations: PTB, preterm birth; APV, annual percentage variation; RR, rate ratio; CI, confidence interval; LB, live births.a 95%) Confidence intervals

*p value <0.05;
