# Supplementary material
Source: Research Square preprint supplement (doi:10.21203/rs.3.rs-10185373/v1)
Supplement: Supplementary file 2 [file cafc883cef2ecfcb73f475e0.docx]

Supplemental 2:

Preterm birth rate per 100 live births by year and province in Ecuador, 2015–2023.

| **Province** | **Year** | | | | | | | | |  |
| --- | --- | --- | --- | --- | --- | --- | --- | --- | --- | --- |
| 2015 | 2016 | 2017 | 2018 | 2019 | 2020 | 2021 | 2022 | 2023 | **mean** |
| Azuay | 7.7 | 7.9 | 9.1 | 8.4 | 9.0 | 7.4 | 9.0 | 8.2 | 8.3 | 8.3 |
| Bolivar | 5.1 | 5.4 | 6.6 | 4.9 | 5.5 | 5.9 | 5.9 | 7.6 | 5.5 | 5.8 |
| Cañar | 3.8 | 2.7 | 3.3 | 2.7 | 2.9 | 3.6 | 4.1 | 6.9 | 4.6 | 3.8 |
| Carchi | 9.6 | 8.9 | 9.9 | 9.4 | 11.5 | 10.5 | 10.3 | 13.2 | 12.6 | 10.6 |
| Cotopaxi | 4.3 | 5.2 | 7.2 | 8.0 | 9.2 | 6.8 | 7.4 | 8.4 | 6.6 | 7.0 |
| Chimborazo | 6.8 | 7.0 | 7.2 | 8.4 | 7.3 | 7.9 | 8.9 | 10.2 | 8.1 | 8.0 |
| El Oro | 6.1 | 6.0 | 7.3 | 9.0 | 10.1 | 8.6 | 8.7 | 8.2 | 9.3 | 8.2 |
| Emeralds | 7.2 | 5.5 | 5.0 | 5.8 | 5.8 | 6.3 | 6.3 | 7.3 | 6.3 | 6.2 |
| Guayas | 7.2 | 7.2 | 7.5 | 7.4 | 7.4 | 6.4 | 6.7 | 6.7 | 6.8 | 7.0 |
| Imbabura | 6.7 | 6.7 | 7.2 | 7.4 | 6.9 | 6.8 | 7.9 | 7.3 | 7.3 | 7.1 |
| Loja | 6.4 | 7.3 | 7.3 | 8.1 | 7.2 | 6.9 | 6.7 | 7.2 | 6.8 | 7.1 |
| Los Rios | 3.5 | 3.5 | 2.9 | 2.7 | 3.3 | 3.2 | 3.8 | 4.6 | 3.9 | 3.5 |
| Manabí | 4.2 | 4.1 | 3.8 | 4.9 | 5.7 | 5.8 | 6.4 | 7.5 | 7.3 | 5.5 |
| Morona Santiago | 4.0 | 5.2 | 5.5 | 6.6 | 6.7 | 5.8 | 5.0 | 6.5 | 3.6 | 5.4 |
| Napo | 4.2 | 2.9 | 3.9 | 3.9 | 4.7 | 4.9 | 5.7 | 6.0 | 3.0 | 4.4 |
| Pastaza | 5.0 | 6.4 | 5.8 | 5.9 | 3.8 | 5.2 | 4.7 | 6.3 | 4.1 | 5.3 |
| Pichincha | 9.5 | 10.2 | 11.0 | 10.8 | 11.4 | 10.8 | 11.9 | 11.8 | 12.2 | 11.1 |
| Tungurahua | 6.1 | 6.4 | 7.1 | 9.2 | 9.8 | 7.9 | 9.4 | 10.2 | 10.0 | 8.5 |
| Zamora | 2.9 | 2.2 | 2.4 | 2.3 | 3.9 | 4.7 | 3.7 | 8.7 | 4.5 | 3.9 |
| Galapagos | 3.9 | 4.7 | 2.6 | 6.7 | 3.5 | 6.3 | 3.9 | 7.7 | 4.0 | 4.8 |
| Sucumbíos | 4.9 | 5.2 | 5.6 | 6.5 | 6.4 | 6.7 | 5.9 | 7.0 | 5.2 | 6.0 |
| Orellana | 3.8 | 6.0 | 5.4 | 4.8 | 5.9 | 6.4 | 5.5 | 7.4 | 5.2 | 5.6 |
| Santo Domingo | 4.6 | 4.7 | 5.2 | 5.9 | 5.3 | 5.6 | 6.2 | 4.8 | 7.2 | 5.5 |
| St. Helena | 2.6 | 3.4 | 3.1 | 3.4 | 3.3 | 3.7 | 3.6 | 6.4 | 5.4 | 3.9 |

Abbreviations: PTNB, newborn preterm; LB: live births.
